# Supplementary material
Source: PubMed Central journal article supplement (PMC3728912)
Supplement: NIHMS389673-supplement-ESI.pdf [file NIHMS389673-supplement-ESI.pdf]

Supplementary Table 1. Model HIV-1 SLB fit parameters and confidence intervals from NR measurements

| Parameter                                             | Fit parameters and Uncertainties        |
|-------------------------------------------------------|-----------------------------------------|
| <b>Layer-by-layer thickness (Å)</b>                   |                                         |
| SiOx                                                  | 6.5 <sup>+1.1</sup> <sub>-1.1</sub>     |
| Hydration Layer                                       | 4.3 <sup>+1.2</sup> <sub>-1.0</sub>     |
| Inner Headgroup                                       | 12.3 <sup>+0.9</sup> <sub>-0.8</sub>    |
| Hydrocarbon Leaflet                                   | 14.8 <sup>+1.0</sup> <sub>-0.8</sub>    |
| Outer Headgroup                                       | 8.0 <sup>+0.8</sup> <sub>-0.5</sub>     |
| Peptide                                               | Not Resolved                            |
| <b>Volume filling, nSLD, and bilayer completeness</b> |                                         |
| nSLD SiOx                                             | 3.58 <sup>+0.21</sup> <sub>-0.17</sub>  |
| Roughness of SiOx (sigma)                             | 1.8 <sup>+2.4</sup> <sub>-0.8</sub>     |
| nSLD headgroup                                        | 2.05 <sup>+0.26</sup> <sub>-0.25</sub>  |
| nSLD hydrocarbons                                     | -0.41 <sup>+0.07</sup> <sub>-0.07</sub> |
| Inner headgroup volume filling                        | 0.73 <sup>+0.12</sup> <sub>-0.21</sub>  |
| Outer headgroup volume filling                        | 0.78 <sup>+0.11</sup> <sub>-0.30</sub>  |
| Peptide volume filling                                | 0.00 <sup>+0.05</sup> <sub>-0.00</sub>  |
| SLB completeness                                      | 1.00 <sup>+0.00</sup> <sub>-0.01</sub>  |
